# Supplementary material for: Evidence of successful malaria case management policy implementation in Cambodia: results from national ACTwatch outlet surveys
Source: Springer Nature journal article supplement (doi:10.1186/s12936-016-1200-2), 2016-04-08
Supplement: MOESM2 [file 10027238]

Supplementary file 2, RDT Audit, Cambodia 2013

|                                                                                                                                     |                                                                                                                                      |                                                                                                                                                            |                                                                                                                                                                                                                                                                           |                                   |                                                                                                                                                                                                                                                  |
|-------------------------------------------------------------------------------------------------------------------------------------|--------------------------------------------------------------------------------------------------------------------------------------|------------------------------------------------------------------------------------------------------------------------------------------------------------|---------------------------------------------------------------------------------------------------------------------------------------------------------------------------------------------------------------------------------------------------------------------------|-----------------------------------|--------------------------------------------------------------------------------------------------------------------------------------------------------------------------------------------------------------------------------------------------|
| Clinic code<br>_____<br>_____<br>Product number<br>_____<br>_____                                                                   | <b>1. Brand name</b><br>(Include the terms such as Pf, Pv, Pan if visible on the pack)                                               | <b>2. Manufacturer</b>                                                                                                                                     | <b>3. Country of Manufacture</b><br><br>_____                                                                                                                                                                                                                             | <b>4. Lot Number</b><br><br>_____ | <b>5. Number of tests sold/ distributed /used in the last 7 days to individual consumers (Record total # of tests)</b><br>This outlet sold or distributed<br><br>_____ tests in the last 7 days<br><br><i>Refused = 9997 ; Don't know = 9998</i> |
| <b>6a. Has this test been stocked out at any point in the past 2 weeks?</b><br><br>1 = Yes<br>0 = No<br>8 = Don't know<br><br>_____ | <b>6b. Has this test been stocked out at any point in the past 3 months?</b><br><br>1 = Yes<br>0 = No<br>8 = Don't know<br><br>_____ | <b>6c. Has this test been stocked out for at least one week at any point in the past 3 months?</b><br><br>1 = Yes<br>0 = No<br>8 = Don't know<br><br>_____ | <b>7. Price for adults</b><br>What is the <u>total cost</u> of an RDT for an adult: _____ Riel<br><br>Of this total, what is the cost for the <u>test kit only</u> : _____ Riel<br><br>Of this total, what is the cost for <u>consultation or other fees</u> : _____ Riel |                                   | <b>8. Wholesale purchase price</b><br>For the outlet's most recent wholesale purchase:<br><br>_____ tests cost<br><br>_____ Riel                                                                                                                 |
| <i>Free = 00000; NA = 99995; Refused = 99997; Don't Know</i>                                                                        |                                                                                                                                      |                                                                                                                                                            |                                                                                                                                                                                                                                                                           |                                   | <b>9. Comments</b>                                                                                                                                                                                                                               |

RDT Audit Sheet [\_\_|\_\_] of [\_\_|\_\_]
